# Supplementary material for: Gsg1, Trnp1, and Tmem215 Mark Subpopulations of Bipolar Interneurons in the Mouse Retina
Source: PubMed Central journal article supplement — Invest Ophthalmol Vis Sci. 2017 Feb;58(2):1137–50. doi: 10.1167/iovs.16-19767 (PMC5317276; doi:10.1167/iovs.16-19767), 2017-02
Supplement: iovs-58-02-09_s02.pdf [file iovs-58-02-09_s02.pdf]

**Supplemental Table 2: Primers used for RT-PCR**

| <b>Gene</b>    | <b>Forward (5'-3')</b>   | <b>Reverse (5'-3')</b> |
|----------------|--------------------------|------------------------|
| <i>Cdh8</i>    | TTCCCCTTGCAGCTATTTAGTCT  | TGCTGTATCGGACTGTCTTGC  |
| <i>Fam19a3</i> | CAACATCCGCAGTCCTAGTGA    | GAGCACCTTACACTCCTCTCC  |
| <i>Fezf2</i>   | GTCACCGGCCACTTCTAAAC     | GTCTGCCTCTAACGCAGCA    |
| <i>Gsg1</i>    | CCAGCGGACCTTCATTTCTG     | CGGCATGTCAAAGCACTTGG   |
| <i>Lhx4</i>    | GGCTGCAACCAACATATCCTG    | CATTTTGTGCCAAAGCGTTTGA |
| <i>Neurod1</i> | ATGACCAAATCATAACAGCGAGAG | TCTGCCTCGTGTTCCCTCGT   |
| <i>Otx2</i>    | CCGCCTTACGCAGTCAATG      | GAGGGATGCAGCAAGTCCATA  |
| <i>Pax6</i>    | AGGCCAGCAACACTCCTAGT     | GCGGAGGGGTGTAGGTATCAT  |
| <i>Rho</i>     | CCCTTCTCCAACGTCACAGG     | TGAGGAAGTTGATGGGGAAGC  |
| <i>Samsn1</i>  | CCAAGTCCCTATGACACCGAC    | CCTGGATAGTCTGGTGGTTCT  |
| <i>Scgn</i>    | ATGGACAACGCACGCAGAAA     | TCCTCAGTGCCAGATTTTGCC  |
| <i>Slitrk6</i> | GGTCTGTGGTTGGTGTTTT      | GACTGAGGGCATTGGTGACT   |
| <i>Tmem215</i> | GCCTGATGACATAAATCCGAGG   | GGTGCAGCCTTCGGTTTTTC   |
| <i>Trnp1</i>   | CATCTACGCGGAGGAGTCAG     | CGAGACTGGGTACCGTCAGT   |
